# Supplementary material
Source: ML conference proceedings conference paper supplement (https://proceedings.mlr.press/v38/chen15d.html)
Supplement: Supplementary file 1 [file chen15d-supp.pdf]

## Proofs

**Lemma 1.** *The constrained optimization of (19) is equivalent to:*

$$\operatorname{argmax}_{\{f(\bar{\mathbf{u}}_{1:T}|\bar{\mathbf{z}}_{1:T},\bar{\mathbf{x}}_{1:T})\}} H(\bar{\mathbf{U}}_{1:T}|\bar{\mathbf{Z}}_{1:T},\bar{\mathbf{X}}_{1:T}) \quad (34)$$

$$\text{where: } f(\bar{\mathbf{u}}_{1:t}|\bar{\mathbf{z}}_{1:T},\bar{\mathbf{x}}_{1:T}) = \prod_{t=1}^T f(\bar{u}_t|\bar{\mathbf{u}}_{1:t-1},\bar{\mathbf{z}}_{1:t},\bar{\mathbf{x}}_{1:t}); \quad (35)$$

$$\forall t \in \{1 \cdots T\}, \bar{\mathbf{u}}_{1:t} \in \bar{\mathcal{U}}_{1:t}, \bar{\mathbf{z}}_{1:t} \in \bar{\mathcal{Z}}_{1:t}, \bar{\mathbf{x}}_{1:t} \in \bar{\mathcal{X}}_{1:t}, \bar{\mathbf{x}}'_{1:t} \in \bar{\mathcal{X}}'_{1:t},$$

$$\text{such that } f(\bar{u}_t|\bar{\mathbf{u}}_{1:t-1},\bar{\mathbf{z}}_{1:t},\bar{\mathbf{x}}_{1:t}) \geq 0, \int_{\bar{u}_t \in \bar{\mathcal{U}}_t} f(\bar{u}_t|\bar{\mathbf{u}}_{1:t-1},\bar{\mathbf{z}}_{1:t},\bar{\mathbf{x}}_{1:t}) = 1, \quad (36)$$

$$f(\bar{u}_t|\bar{\mathbf{u}}_{1:t-1},\bar{\mathbf{z}}_{1:t},\bar{\mathbf{x}}_{1:t}) = f(\bar{u}_t|\bar{\mathbf{u}}_{1:t-1},\bar{\mathbf{z}}_{1:t},\bar{\mathbf{x}}'_{1:t}). \quad (37)$$

*Proof of Lemma 1.* The previously developed theory of maximum causal entropy [28] shows the causally conditioned probability distribution defined according to affine constraint (15),(16) and (18) are equivalent to it defined by the decomposition into a product of conditional probabilities (35),(36). Then, we show partial observability constraint (17) implies (37).

$$\forall \bar{\mathbf{u}}_{1:T} \in \bar{\mathcal{U}}_{1:T}, \bar{\mathbf{x}}_{1:T}, \bar{\mathbf{x}}'_{1:T} \in \bar{\mathcal{X}}_{1:T}, \bar{\mathbf{z}}_{1:T} \in \bar{\mathcal{Z}}_{1:T},$$

$$\prod_{t=1}^T f(\bar{u}_t|\bar{\mathbf{u}}_{1:t-1},\bar{\mathbf{z}}_{1:t},\bar{\mathbf{x}}_{1:t}) = \prod_{t=1}^T f(\bar{u}_t|\bar{\mathbf{u}}_{1:t-1},\bar{\mathbf{z}}_{1:t},\bar{\mathbf{x}}'_{1:t})$$

$$\text{It is possible, } f(\bar{u}_1|\bar{z}_1,\bar{x}_1) \cdots f(\bar{u}_t|\bar{\mathbf{u}}_{1:t-1},\bar{\mathbf{z}}_{1:t},\bar{\mathbf{x}}_{1:t}) \cdots f(\bar{u}_T|\bar{\mathbf{u}}_{1:T-1},\bar{\mathbf{z}}_{1:T},\bar{\mathbf{x}}_{1:T}) \\ = f(\bar{u}_1|\bar{z}_1,\bar{x}_1) \cdots f(\bar{u}_t|\bar{\mathbf{u}}_{1:t-1},\bar{\mathbf{z}}_{1:t},\bar{\mathbf{x}}'_{1:t}) \cdots f(\bar{u}_T|\bar{\mathbf{u}}_{1:T-1},\bar{\mathbf{z}}_{1:T},\bar{\mathbf{x}}_{1:T})$$

$$\text{Thus, } f(\bar{u}_t|\bar{\mathbf{u}}_{1:t-1},\bar{\mathbf{z}}_{1:t},\bar{\mathbf{x}}_{1:t}) = f(\bar{u}_t|\bar{\mathbf{u}}_{1:t-1},\bar{\mathbf{z}}_{1:t},\bar{\mathbf{x}}'_{1:t}).$$

It is easy to show (37) implies (17). □

**Lemma 2.** *The constrained optimization defined in Lemma 1 is equivalent to:*

$$\operatorname{argmax}_{\{f(\bar{\mathbf{u}}_{1:T}|\bar{\mathbf{z}}_{1:T})\}} H(\bar{\mathbf{U}}_{1:T}|\bar{\mathbf{Z}}_{1:T}) \quad (38)$$

$$\forall \bar{\mathbf{u}}_{1:T} \in \bar{\mathcal{U}}_{1:T}, \bar{\mathbf{z}}_{1:T}, \bar{\mathbf{z}}'_{1:T} \in \bar{\mathcal{Z}}_{1:T},$$

$$f(\bar{\mathbf{u}}_{1:T}|\bar{\mathbf{z}}_{1:T}) \geq 0, \int_{\bar{\mathbf{u}}'_{1:T} \in \bar{\mathcal{U}}'_{1:T}} f(\bar{\mathbf{u}}'_{1:T}|\bar{\mathbf{z}}_{1:T}) d\bar{\mathbf{u}}'_{1:T} = 1, \quad (39)$$

$$\forall \tau \in \{1, \dots, T\} \text{ such that } \bar{\mathbf{z}}_{1:\tau} = \bar{\mathbf{z}}'_{1:\tau},$$

$$\int_{\bar{\mathbf{u}}_{\tau+1:T} \in \bar{\mathcal{U}}_{\tau+1:T}} f(\bar{\mathbf{u}}_{1:T}|\bar{\mathbf{z}}_{1:T}) d\bar{\mathbf{u}}_{\tau+1:T} = \int_{\bar{\mathbf{u}}_{\tau+1:T} \in \bar{\mathcal{U}}_{\tau+1:T}} f(\bar{\mathbf{u}}_{1:T}|\bar{\mathbf{z}}'_{1:T}) d\bar{\mathbf{u}}_{\tau+1:T}. \quad (40)$$

*Proof of Lemma 2.*

$$\forall t \in \{1, \dots, T\}, \bar{\mathbf{u}}_{1:t} \in \bar{\mathcal{U}}_{1:t}, \bar{\mathbf{z}}_{1:t} \in \bar{\mathcal{Z}}_{1:t}, \bar{\mathbf{x}}_{1:t} \in \bar{\mathcal{X}}_{1:t}, \bar{\mathbf{x}}'_{1:t} \in \bar{\mathcal{X}}'_{1:t},$$

$$f(\bar{u}_t|\bar{\mathbf{u}}_{1:t-1},\bar{\mathbf{z}}_{1:t},\bar{\mathbf{x}}_{1:t}) = f(\bar{u}_t|\bar{\mathbf{u}}_{1:t-1},\bar{\mathbf{z}}_{1:t},\bar{\mathbf{x}}'_{1:t}) = f(\bar{u}_t|\bar{\mathbf{u}}_{1:t-1},\bar{\mathbf{z}}_{1:t})$$

$$\text{Then, } \prod_{t=1}^T f(\bar{u}_t|\bar{\mathbf{u}}_{1:t-1},\bar{\mathbf{z}}_{1:t},\bar{\mathbf{x}}_{1:t}) = \prod_{t=1}^T f(\bar{u}_t|\bar{\mathbf{u}}_{1:t-1},\bar{\mathbf{z}}_{1:t}) = f(\bar{\mathbf{u}}_{1:T}|\bar{\mathbf{z}}_{1:T})$$

Similar to the proof of Lemma 1, the causally conditioned probability distribution defined by a product of conditional probabilities are equivalent to the affine constraint (39), (40).

To show the object function (38) is equivalent to (19), we first show

$$\begin{aligned}
 & \int_{\vec{\mathbf{x}}_{1:T} \in \vec{\mathcal{X}}_{1:T}} f(\vec{\mathbf{z}}_{1:T}, \vec{\mathbf{x}}_{1:T} | \vec{\mathbf{u}}_{1:T-1}) \\
 &= \frac{\int_{\vec{\mathbf{x}}_{1:T} \in \vec{\mathcal{X}}_{1:T}} \prod_{t=1}^T f(\vec{z}_t, \vec{x}_t | \vec{\mathbf{z}}_{1:t-1}, \vec{\mathbf{x}}_{1:t-1}, \vec{\mathbf{u}}_{1:t-1}) \prod_{t=1}^T f(\vec{u}_t | \vec{\mathbf{u}}_{1:t-1}, \vec{\mathbf{z}}_{1:t}, \vec{\mathbf{x}}_{1:t})}{\prod_{t=1}^T f(\vec{u}_t | \vec{\mathbf{u}}_{1:t-1}, \vec{\mathbf{z}}_{1:t})} \\
 &= \frac{\int_{\vec{\mathbf{x}}_{1:T} \in \vec{\mathcal{X}}_{1:T}} f(\vec{\mathbf{u}}_{1:T}, \vec{\mathbf{z}}_{1:T}, \vec{\mathbf{x}}_{1:T})}{\prod_{t=1}^T f(\vec{u}_t | \vec{\mathbf{u}}_{1:t-1}, \vec{\mathbf{z}}_{1:t})} = \frac{f(\vec{\mathbf{u}}_{1:T}, \vec{\mathbf{z}}_{1:T})}{\prod_{t=1}^T f(\vec{u}_t | \vec{\mathbf{u}}_{1:t-1}, \vec{\mathbf{z}}_{1:t})} \\
 &= \frac{\prod_{t=1}^T f(\vec{u}_t | \vec{\mathbf{u}}_{1:t-1}, \vec{\mathbf{z}}_{1:t}) \prod_{t=1}^T f(\vec{z}_t | \vec{\mathbf{z}}_{1:t-1}, \vec{\mathbf{u}}_{1:t-1})}{\prod_{t=1}^T f(\vec{u}_t | \vec{\mathbf{u}}_{1:t-1}, \vec{\mathbf{z}}_{1:t})} \\
 &= \prod_{t=1}^T f(\vec{z}_t | \vec{\mathbf{z}}_{1:t-1}, \vec{\mathbf{u}}_{1:t-1}) = f(\vec{\mathbf{z}}_{1:T} | \vec{\mathbf{u}}_{1:T-1})
 \end{aligned}$$

$$\begin{aligned}
 & \text{Then, } H(\vec{\mathbf{U}}_{1:T} | \vec{\mathbf{Z}}_{1:T}, \vec{\mathbf{X}}_{1:T}) \\
 &= \int_{\vec{\mathbf{u}}_{1:T}, \vec{\mathbf{z}}_{1:T}, \vec{\mathbf{x}}_{1:T}} f(\vec{\mathbf{u}}_{1:T} | \vec{\mathbf{z}}_{1:T}, \vec{\mathbf{x}}_{1:T}) f(\vec{\mathbf{z}}_{1:T}, \vec{\mathbf{x}}_{1:T} | \vec{\mathbf{u}}_{1:T-1}) \log f(\vec{\mathbf{u}}_{1:T} | \vec{\mathbf{z}}_{1:T}, \vec{\mathbf{x}}_{1:T}) \\
 &= \int_{\vec{\mathbf{u}}_{1:T}, \vec{\mathbf{z}}_{1:T}} f(\vec{\mathbf{u}}_{1:T} | \vec{\mathbf{z}}_{1:T}) \log f(\vec{\mathbf{u}}_{1:T} | \vec{\mathbf{z}}_{1:T}) \int_{\vec{\mathbf{x}}_{1:T}} f(\vec{\mathbf{z}}_{1:T}, \vec{\mathbf{x}}_{1:T} | \vec{\mathbf{u}}_{1:T-1}) \\
 &= \int_{\vec{\mathbf{u}}_{1:T}, \vec{\mathbf{z}}_{1:T}} f(\vec{\mathbf{u}}_{1:T} | \vec{\mathbf{z}}_{1:T}) \log f(\vec{\mathbf{u}}_{1:T} | \vec{\mathbf{z}}_{1:T}) f(\vec{\mathbf{z}}_{1:T} | \vec{\mathbf{u}}_{1:T-1}) \\
 &= H(\vec{\mathbf{U}}_{1:T} | \vec{\mathbf{Z}}_{1:T})
 \end{aligned}$$

□

**Lemma 3.** Suppose the constrained optimization problem in Lemma 2 has the following additional constraint:  $(F : \vec{\mathcal{U}}_{1:T} \times \vec{\mathcal{Z}}_{1:T} \rightarrow R^N, \vec{\mathbf{c}} \in R^N)$

$$\mathbb{E}_{f(\vec{\mathbf{u}}_{1:T}, \vec{\mathbf{z}}_{1:T})} [F(\vec{\mathbf{U}}_{1:T}, \vec{\mathbf{Z}}_{1:T})] = \vec{\mathbf{c}} \quad (41)$$

Then the solution to this optimization problem has the form:

$$\hat{f}(\vec{u}_t | \vec{\mathbf{u}}_{1:t-1}, \vec{\mathbf{z}}_{1:t}) = e^{Q(\vec{\mathbf{u}}_{1:t}, \vec{\mathbf{z}}_{1:t}) - V(\vec{\mathbf{u}}_{1:t-1}, \vec{\mathbf{z}}_{1:t})}$$

where  $Q$  and  $V$  functions take the following recursive form:

$$\begin{aligned}
 Q(\vec{\mathbf{u}}_{1:t}, \vec{\mathbf{z}}_{1:t}) &= \begin{cases} \lambda^T F(\vec{\mathbf{u}}_{1:T}, \vec{\mathbf{z}}_{1:T}), & t = T; \\ \mathbb{E}[V(\vec{\mathbf{U}}_{1:t}, \vec{\mathbf{Z}}_{1:t+1}) | \vec{\mathbf{u}}_{1:t}, \vec{\mathbf{z}}_{1:t}], & t < T \end{cases} \\
 V(\vec{\mathbf{u}}_{1:t-1}, \vec{\mathbf{z}}_{1:t}) &= \text{softmax}_{\vec{u}_t} Q(\vec{\mathbf{u}}_{1:t}, \vec{\mathbf{z}}_{1:t}) \triangleq \log \int_{\vec{u}_t} e^{Q(\vec{\mathbf{u}}_{1:t}, \vec{\mathbf{z}}_{1:t})} d\vec{u}_t
 \end{aligned}$$

*Proof of Lemma 3.* We first show for any joint distribution  $g(\vec{\mathbf{u}}_{1:T}, \vec{\mathbf{z}}_{1:T})$ , the following equation holds:

$$\mathbb{E}_g \left[ -\log \hat{f}(\vec{\mathbf{U}}_{1:T} | \vec{\mathbf{Z}}_{1:T}) \right] = \int_{\vec{\mathbf{z}}_1} f(\vec{\mathbf{z}}_1) V(\vec{\mathbf{z}}_1) - \mathbb{E}_g \left[ \lambda^T F(\vec{\mathbf{U}}_{1:T}, \vec{\mathbf{Z}}_{1:T}) \right] \quad (42)$$

$$\begin{aligned}
 & \mathbb{E}_g \left[ \sum_{t=1}^T -\log \hat{f}(\vec{U}_t | \vec{U}_{1:t-1}, \vec{Z}_{1:t}) \right] \\
 &= \mathbb{E}_g \left[ -\lambda^T F(\vec{U}_{1:T}, \vec{Z}_{1:T}) - \sum_{t=1}^{T-1} Q(\vec{U}_{1:t}, \vec{Z}_{1:t}) + \sum_{t=1}^T V(\vec{U}_{1:t-1}, \vec{Z}_{1:t}) \right] \\
 &= \mathbb{E}_g \left[ -\lambda^T F(\vec{U}_{1:T}, \vec{Z}_{1:T}) \right] - \int_{\vec{u}_{1:T}, \vec{z}_{1:T}} g(\vec{u}_{1:T}, \vec{z}_{1:T}) \sum_{t=1}^{T-1} \int_{\vec{z}_{t+1}} f(\vec{z}_{t+1} | \vec{u}_{1:t}, \vec{z}_{1:t}) V(\vec{u}_{1:t}, \vec{z}_{1:t+1}) \\
 &\quad + \int_{\vec{u}_{1:T}, \vec{z}_{1:T}} g(\vec{u}_{1:T}, \vec{z}_{1:T}) \sum_{t=1}^T V(\vec{u}_{1:t-1}, \vec{z}_{1:t}) \\
 &= \mathbb{E}_g \left[ -\lambda^T F(\vec{U}_{1:T}, \vec{Z}_{1:T}) \right] - \sum_{t=1}^{T-1} \int_{\vec{u}_{1:t}, \vec{z}_{1:t+1}} g(\vec{u}_{1:t}, \vec{z}_{1:t+1}) V(\vec{u}_{1:t}, \vec{z}_{1:t+1}) \\
 &\quad + \int_{\vec{u}_{1:T}, \vec{z}_{1:T}} g(\vec{u}_{1:T}, \vec{z}_{1:T}) \sum_{t=1}^T V(\vec{u}_{1:t-1}, \vec{z}_{1:t})
 \end{aligned}$$

which implies equation (42).

For any arbitrary causally conditional probability distribution  $g(\vec{u}_{1:T} | \vec{z}_{1:T})$  satisfies with expectation constraint (41), we show:

$$\begin{aligned}
 & H_g(\vec{U}_{1:T} | \vec{Z}_{1:T}) \leq H_{\hat{f}}(\vec{U}_{1:T} | \vec{Z}_{1:T}) \\
 & \mathbb{E}_g \left[ -\log g(\vec{U}_{1:T} | \vec{Z}_{1:T}) \right] \\
 &= - \int_{\vec{u}_{1:T}, \vec{z}_{1:T}} g(\vec{u}_{1:T}, \vec{z}_{1:T}) \log \left( \frac{g(\vec{u}_{1:T} | \vec{z}_{1:T}) f(\vec{z}_{1:T} | \vec{u}_{1:T-1})}{\hat{f}(\vec{u}_{1:T} | \vec{z}_{1:T}) f(\vec{z}_{1:T} | \vec{u}_{1:T-1})} \hat{f}(\vec{u}_{1:T} | \vec{z}_{1:T}) \right) \\
 &= -D_{KL} \left( g(\vec{u}_{1:T}, \vec{z}_{1:T}) | \hat{f}(\vec{u}_{1:T}, \vec{z}_{1:T}) \right) - \int_{\vec{u}_{1:T}, \vec{z}_{1:T}} g(\vec{u}_{1:T}, \vec{z}_{1:T}) \log \hat{f}(\vec{u}_{1:T} | \vec{z}_{1:T}) \\
 &\leq - \int_{\vec{u}_{1:T}, \vec{z}_{1:T}} g(\vec{u}_{1:T}, \vec{z}_{1:T}) \log \hat{f}(\vec{u}_{1:T} | \vec{z}_{1:T}) \\
 &= \int_{\vec{z}_1} f(\vec{z}_1) V(\vec{z}_1) - \mathbb{E}_g \left[ \lambda^T F(\vec{U}_{1:T}, \vec{Z}_{1:T}) \right] \\
 &= \int_{\vec{z}_1} f(\vec{z}_1) V(\vec{z}_1) - \mathbb{E}_{\hat{f}} \left[ \lambda^T F(\vec{U}_{1:T}, \vec{Z}_{1:T}) \right] \\
 &= H_{\hat{f}}(\vec{U}_{1:T} | \vec{Z}_{1:T})
 \end{aligned}$$

$D_{KL}$  is the Kullback-Leibler divergence which is non-negative[8]. Thus,  $\hat{f}(\vec{u}_t | \vec{u}_{1:t-1}, \vec{z}_{1:t})$  is the solution to the optimization problem in Lemma 2 incorporates with expectation constraint (41).  $\square$

*Proof of Theorem 1.* We first incorporate the expectation constraint (20) into the constrained optimization problem defined in Lemma 2

$$\begin{aligned}
 & \mathbb{E}_{f(\vec{u}_{1:T}, \vec{z}_{1:T+1}, \vec{x}_{1:T+1})} \left[ \sum_{t=1}^{T+1} \vec{x}_t \vec{x}_t^T \right] \\
 &= \int_{\vec{u}_{1:T}, \vec{z}_{1:T+1}, \vec{x}_{1:T+1}} f(\vec{u}_{1:T} | \vec{z}_{1:T}, \vec{x}_{1:T}) f(\vec{z}_{1:T+1}, \vec{x}_{1:T+1} | \vec{u}_{1:T}) \sum_{t=1}^{T+1} \vec{x}_t \vec{x}_t^T \\
 &= \int_{\vec{u}_{1:T}, \vec{z}_{1:T}} f(\vec{u}_{1:T} | \vec{z}_{1:T}) f(\vec{z}_{1:T} | \vec{u}_{1:T-1}) \frac{\int_{\vec{x}_{1:T+1}, \vec{z}_{T+1}} f(\vec{z}_{1:T+1}, \vec{x}_{1:T+1} | \vec{u}_{1:T}) \sum_{t=1}^{T+1} \vec{x}_t \vec{x}_t^T}{f(\vec{z}_{1:T} | \vec{u}_{1:T-1})} \\
 &= \mathbb{E}_{f(\vec{u}_{1:T}, \vec{z}_{1:T})} \left[ \frac{\int_{\vec{x}_{1:T+1}, \vec{z}_{T+1}} f(\vec{z}_{1:T+1}, \vec{x}_{1:T+1} | \vec{U}_{1:T}) \sum_{t=1}^{T+1} \vec{x}_t \vec{x}_t^T}{f(\vec{Z}_{1:T} | \vec{U}_{1:T-1})} \right]
 \end{aligned}$$

According to Lemma 3, the solution to the constrained problem defined in Lemma 2 incorporates with the expected constraint (41) takes the following recursive form:

$$Q(\vec{\mathbf{u}}_{1:t}, \vec{\mathbf{z}}_{1:t}) = \begin{cases} \frac{\int_{\vec{\mathbf{x}}_{1:T+1}, \vec{\mathbf{x}}_{T+1}} f(\vec{\mathbf{z}}_{1:T+1}, \vec{\mathbf{x}}_{1:T+1} | \vec{\mathbf{u}}_{1:T}) \sum_{t=1}^{T+1} \vec{x}_t^T \mathbf{M} \vec{x}_t}{f(\vec{\mathbf{z}}_{1:T} | \vec{\mathbf{u}}_{1:T-1})}, & t = T; \\ \mathbb{E}[V(\vec{\mathbf{U}}_{1:t}, \vec{\mathbf{Z}}_{1:t+1}) | \vec{\mathbf{u}}_{1:t}, \vec{\mathbf{z}}_{1:t}], & t < T \end{cases}$$

$$V(\vec{\mathbf{u}}_{1:t-1}, \vec{\mathbf{z}}_{1:t}) = \underset{\vec{\mathbf{u}}_t}{\text{softmax}} Q(\vec{\mathbf{u}}_{1:t}, \vec{\mathbf{z}}_{1:t}) \triangleq \log \int_{\vec{\mathbf{u}}_t} e^{Q(\vec{\mathbf{u}}_{1:t}, \vec{\mathbf{z}}_{1:t})} d\vec{\mathbf{u}}_t$$

$$Q(\vec{\mathbf{u}}_{1:T}, \vec{\mathbf{z}}_{1:T}) = \underbrace{\frac{\int_{\vec{\mathbf{x}}_{1:T}} f(\vec{\mathbf{z}}_{1:T}, \vec{\mathbf{x}}_{1:T} | \vec{\mathbf{u}}_{1:T-1}) \mathbb{E} \left[ \vec{\mathbf{X}}_{T+1}^T \mathbf{M} \vec{\mathbf{X}}_{T+1} | \vec{\mathbf{X}}_T, \vec{\mathbf{u}}_T \right]}{f(\vec{\mathbf{z}}_{1:T} | \vec{\mathbf{u}}_{1:T-1})}}_{\text{We define it } Q'(\vec{\mathbf{u}}_{1:T}, \vec{\mathbf{z}}_{1:T})}$$

$$+ \underbrace{\frac{\int_{\vec{\mathbf{x}}_{1:T}} f(\vec{\mathbf{z}}_{1:T}, \vec{\mathbf{x}}_{1:T} | \vec{\mathbf{u}}_{1:T-1}) \sum_{t=1}^T \vec{x}_t^T \mathbf{M} \vec{x}_t}{f(\vec{\mathbf{z}}_{1:T} | \vec{\mathbf{u}}_{1:T-1})}}_{\text{This is a constant term with respect to } \vec{\mathbf{u}}_T, \text{ we define it } W_T}$$

This is a constant term with respect to  $\vec{\mathbf{u}}_T$ , we define it  $W_T$

$$Q'(\vec{\mathbf{u}}_{1:T}, \vec{\mathbf{z}}_{1:T}) =$$

$$\begin{aligned} & \frac{\int_{\vec{\mathbf{x}}_{1:T}} f(\vec{\mathbf{z}}_{1:T}, \vec{\mathbf{x}}_{1:T} | \vec{\mathbf{u}}_{1:T-1}) f(\vec{\mathbf{u}}_{1:T} | \vec{\mathbf{x}}_{1:T}, \vec{\mathbf{z}}_{1:T}) \mathbb{E} \left[ \vec{\mathbf{X}}_{T+1}^T \mathbf{M} \vec{\mathbf{X}}_{T+1} | \vec{\mathbf{X}}_T, \vec{\mathbf{u}}_T \right]}{f(\vec{\mathbf{z}}_{1:T} | \vec{\mathbf{u}}_{1:T-1}) f(\vec{\mathbf{u}}_{1:T} | \vec{\mathbf{z}}_{1:T})} \\ &= \frac{\int_{\vec{\mathbf{x}}_{T+1}} f(\vec{\mathbf{x}}_{T+1}, \vec{\mathbf{u}}_{1:T}, \vec{\mathbf{z}}_{1:T}) \vec{x}_{T+1}^T \mathbf{M} \vec{x}_{T+1}}{f(\vec{\mathbf{u}}_{1:T}, \vec{\mathbf{z}}_{1:T})} \\ &= \mathbb{E} \left[ \vec{\mathbf{X}}_{T+1}^T \mathbf{M} \vec{\mathbf{X}}_{T+1} | \vec{\mathbf{u}}_{1:T}, \vec{\mathbf{z}}_{1:T} \right] \end{aligned}$$

$$\text{Let } V'(\vec{\mathbf{u}}_{1:T-1}, \vec{\mathbf{z}}_{1:T}) = \log \int_{\vec{\mathbf{u}}_T} Q'(\vec{\mathbf{u}}_{1:T}, \vec{\mathbf{z}}_{1:T})$$

$$\begin{aligned} Q(\vec{\mathbf{u}}_{1:T-1}, \vec{\mathbf{z}}_{1:T-1}) &= \int_{\vec{\mathbf{z}}_T} f(\vec{\mathbf{z}}_T | \vec{\mathbf{u}}_{1:T-1}, \vec{\mathbf{z}}_{1:T-1}) (W_T + V'(\vec{\mathbf{u}}_{1:T-1}, \vec{\mathbf{z}}_{1:T})) \\ &= \frac{\int_{\vec{\mathbf{z}}_T, \vec{\mathbf{x}}_{1:T}} f(\vec{\mathbf{z}}_{1:T}, \vec{\mathbf{x}}_{1:T} | \vec{\mathbf{u}}_{1:T-1}) f(\vec{\mathbf{u}}_{1:T-1} | \vec{\mathbf{x}}_{1:T-1}, \vec{\mathbf{z}}_{1:T-1}) \vec{x}_T^T \mathbf{M} \vec{x}_T}{f(\vec{\mathbf{z}}_{1:T-1} | \vec{\mathbf{u}}_{1:T-2}) f(\vec{\mathbf{u}}_{1:T-1} | \vec{\mathbf{z}}_{1:T-1})} \\ &\quad + \mathbb{E} \left[ V'(\vec{\mathbf{U}}_{1:T-1}, \vec{\mathbf{Z}}_{1:T}) | \vec{\mathbf{u}}_{1:T-1}, \vec{\mathbf{z}}_{1:T-1} \right] + W_{T-1} \\ &= \mathbb{E} \left[ \underbrace{\vec{\mathbf{X}}_T^T \mathbf{M} \vec{\mathbf{X}}_T + V'(\vec{\mathbf{U}}_{1:T-1}, \vec{\mathbf{Z}}_{1:T})}_{\text{We define it } Q'(\vec{\mathbf{u}}_{1:T-1}, \vec{\mathbf{z}}_{1:T-1})} | \vec{\mathbf{u}}_{1:T-1}, \vec{\mathbf{z}}_{1:T-1} \right] + W_{T-1} \end{aligned}$$

$$\text{And let } V'(\vec{\mathbf{u}}_{1:T-2}, \vec{\mathbf{z}}_{1:T-1}) = \log \int_{\vec{\mathbf{u}}_{T-1}} Q'(\vec{\mathbf{u}}_{1:T-1}, \vec{\mathbf{z}}_{1:T-1})$$

For  $t < T - 1$ , the argument to  $Q'(\vec{\mathbf{u}}_{1:t}, \vec{\mathbf{z}}_{1:t})$ ,  $V'(\vec{\mathbf{u}}_{1:t-1}, \vec{\mathbf{z}}_{1:t})$  is similar. We redefine  $Q(\vec{\mathbf{u}}_{1:t}, \vec{\mathbf{z}}_{1:t}) = Q'(\vec{\mathbf{u}}_{1:t}, \vec{\mathbf{z}}_{1:t})$  and  $V(\vec{\mathbf{u}}_{1:t-1}, \vec{\mathbf{z}}_{1:t}) = V'(\vec{\mathbf{u}}_{1:t-1}, \vec{\mathbf{z}}_{1:t})$  which gives the recursive form in Theorem 1.  $\square$

**Lemma 4.** *The distribution of belief state  $\vec{\mathbf{X}}_t | b_t \sim N(\vec{\mu}_{b_t}, \Sigma_{b_t})$  is recursively defined as following and  $\Sigma_{b_t}$  is independent of  $b_t$ .*

$$\vec{\mu}_{b_1} = \vec{\mu} + \Sigma_{d_1}^T \mathbf{C}^T (\Sigma_o + \mathbf{C} \Sigma_{d_1}^T \mathbf{C}^T)^{-1} (\vec{\mathbf{Z}}_1 - \mathbf{C} \vec{\mu}) \quad (43)$$

$$\Sigma_{b_1} = \Sigma_{d_1} - \Sigma_{d_1}^T \mathbf{C}^T (\Sigma_o + \mathbf{C} \Sigma_{d_1}^T \mathbf{C}^T)^{-1} \mathbf{C} \Sigma_{d_1} \quad (44)$$

$$\begin{aligned} \vec{\mu}_{b_{t+1}} &= \mathbf{B} \vec{\mathbf{U}}_t + \mathbf{A} \vec{\mu}_{b_t} + (\Sigma_d + \mathbf{A} \Sigma_{b_t}^T \mathbf{A}^T)^T \mathbf{C}^T \\ &\quad (\Sigma_o + \mathbf{C} (\Sigma_d + \mathbf{A} \Sigma_{b_t}^T \mathbf{A}^T)^T \mathbf{C}^T)^{-1} (\vec{\mathbf{Z}}_{t+1} - \mathbf{C} (\mathbf{B} \vec{\mathbf{U}}_t + \mathbf{A} \vec{\mu}_{b_t})) \end{aligned} \quad (45)$$

$$\begin{aligned} \Sigma_{b_{t+1}} &= \Sigma_d + \mathbf{A} \Sigma_{b_t}^T \mathbf{A}^T - (\Sigma_d + \mathbf{A} \Sigma_{b_t}^T \mathbf{A}^T)^T \mathbf{C}^T \\ &\quad (\Sigma_o + \mathbf{C} (\Sigma_d + \mathbf{A} \Sigma_{b_t}^T \mathbf{A}^T)^T \mathbf{C}^T)^{-1} \mathbf{C} (\Sigma_d + \mathbf{A} \Sigma_{b_t}^T \mathbf{A}^T) \end{aligned} \quad (46)$$

*Proof of Lemma 4.* Since  $\vec{\mathbf{Z}}_1|\vec{x}_1 \sim N(\mathbf{C}\vec{x}_1, \Sigma_o)$  and  $\vec{\mathbf{X}}_1 \sim N(\vec{\mu}, \Sigma_{d_1})$ , applying Gaussian transformation techniques, it is easy to show that the distribution of initial belief state  $\vec{\mathbf{X}}_1|b_1$  (that is  $\vec{\mathbf{X}}_1|\vec{z}_1$ ) is a Gaussian distribution with mean (43) and variance (44).

Note that  $f(\vec{x}_{t+1}|\vec{x}_t, \vec{u}_t, b_t) = f(\vec{x}_{t+1}|\vec{x}_t, \vec{u}_t) \quad \vec{\mathbf{X}}_{t+1}|\vec{x}_t, \vec{u}_t \sim N(\mathbf{A}\vec{x}_t + \mathbf{B}\vec{u}_t, \Sigma_d)$

$$f(\vec{x}_t|\vec{u}_t, b_t) = f(\vec{x}_t|b_t) \quad \vec{\mathbf{X}}_t|b_t \sim N(\vec{\mu}_{b_t}, \Sigma_{b_t})$$

$$\text{Then } \vec{\mathbf{X}}_{t+1}|\vec{u}_t, b_t \sim N(\mathbf{B}\vec{u}_t + \mathbf{A}\vec{\mu}_{b_t}, \Sigma_d + \mathbf{A}\Sigma_{b_t}^T\mathbf{A}^T)$$

Furthermore  $f(\vec{z}_{t+1}|\vec{x}_{t+1}, \vec{u}_t, b_t) = f(\vec{z}_{t+1}|\vec{x}_{t+1}) \quad \vec{\mathbf{Z}}_{t+1}|\vec{x}_{t+1} \sim N(\mathbf{C}\vec{x}_{t+1}, \Sigma_o)$

Thus, it's easy to show the distribution of  $\vec{\mathbf{X}}_{t+1}, \vec{\mathbf{Z}}_{t+1}|\vec{u}_t, b_t$  is:

$$N \left( \begin{array}{cc} \mathbf{B}\vec{u}_t + \mathbf{A}\vec{\mu}_{b_t} & \Sigma_d + \mathbf{A}\Sigma_{b_t}^T\mathbf{A}^T \\ \mathbf{C}(\mathbf{B}\vec{u}_t + \mathbf{A}\vec{\mu}_{b_t}) & \mathbf{C}(\Sigma_d + \mathbf{A}\Sigma_{b_t}^T\mathbf{A}^T) \end{array}, \begin{array}{c} (\Sigma_d + \mathbf{A}\Sigma_{b_t}^T\mathbf{A}^T)^T\mathbf{C}^T \\ \Sigma_o + \mathbf{C}(\Sigma_d + \mathbf{A}\Sigma_{b_t}^T\mathbf{A}^T)^T\mathbf{C}^T \end{array} \right)$$

Finally,  $f(\vec{x}_{t+1}|b_{t+1}) = f(\vec{x}_{t+1}|\vec{z}_{t+1}, \vec{u}_t, b_t) = f(\vec{x}_{t+1}, \vec{z}_{t+1}|\vec{u}_t, b_t)/f(\vec{z}_{t+1}|\vec{u}_t, b_t)$  which gives the distribution of  $\vec{\mathbf{X}}_{t+1}|b_{t+1}$  with mean (45) and variance (46).  $\square$

*Proof of Theorem 2.*

$$\begin{aligned} \mathbb{E}[\vec{\mathbf{X}}_{t+1}^T \mathbf{M} \vec{\mathbf{X}}_{t+1} | \vec{\mathbf{u}}_{1:t}, \vec{\mathbf{z}}_{1:t}] &= \mathbb{E}[\vec{\mathbf{X}}_{t+1}^T \mathbf{M} \vec{\mathbf{X}}_{t+1} | \vec{u}_t, b_t] \\ &= (\mathbf{B}\vec{u}_t + \mathbf{A}\vec{\mu}_{b_t})^T \mathbf{M} (\mathbf{B}\vec{u}_t + \mathbf{A}\vec{\mu}_{b_t}) + \text{tr}(\mathbf{M}(\Sigma_d + \mathbf{A}\Sigma_{b_t}^T\mathbf{A}^T)) \\ &= \begin{bmatrix} \vec{u}_t \\ \vec{\mu}_{b_t} \end{bmatrix}^T \begin{bmatrix} \mathbf{B} & \mathbf{A} \end{bmatrix}^T \mathbf{M} \begin{bmatrix} \mathbf{B} & \mathbf{A} \end{bmatrix} \begin{bmatrix} \vec{u}_t \\ \vec{\mu}_{b_t} \end{bmatrix} + \text{constant} \end{aligned}$$

Thus  $Q(\vec{\mathbf{u}}_{1:T}, \vec{\mathbf{z}}_{1:T}) = Q(\vec{u}_T, \vec{\mu}_{b_T}) = \mathbb{E}[\vec{\mathbf{X}}_{t+1}^T \mathbf{M} \vec{\mathbf{X}}_{t+1} | \vec{u}_t, b_t]$  gives  $\mathbf{W}_T$ .

$$\begin{aligned} V(\vec{\mathbf{u}}_{1:T-1}, \vec{\mathbf{z}}_{1:T}) &= V(\vec{\mu}_{b_T}) = V(\vec{z}_T, \vec{u}_{T-1}, \vec{\mu}_{T-1}) = \log \int_{\vec{u}_T} e^{Q(\vec{u}_T, \vec{\mu}_{b_T})} \\ &= \vec{\mu}_{b_T}^T (\mathbf{W}_{T(\mu, \mu)} - \mathbf{W}_{T(U, \mu)}^T \mathbf{W}_{T(U, U)}^{-1} \mathbf{W}_{T(U, \mu)}) \vec{\mu}_{b_T} + \text{constant} \\ &= \begin{bmatrix} \vec{z}_T \\ \vec{u}_{T-1} \\ \vec{\mu}_{b_{T-1}} \end{bmatrix}^T \mathbf{P}_T^T (\mathbf{W}_{T(\mu, \mu)} - \mathbf{W}_{T(U, \mu)}^T \mathbf{W}_{T(U, U)}^{-1} \mathbf{W}_{T(U, \mu)}) \mathbf{P}_T \begin{bmatrix} \vec{z}_T \\ \vec{u}_{T-1} \\ \vec{\mu}_{b_{T-1}} \end{bmatrix} + \text{constant} \end{aligned}$$

which gives  $\mathbf{D}_T$ .

$$\begin{aligned} \text{Thus } \mathbb{E}[V(\vec{\mathbf{U}}_{1:t}, \vec{\mathbf{Z}}_{1:t+1}) | \vec{\mathbf{u}}_{1:t}, \vec{\mathbf{z}}_{1:t}] &= \mathbb{E}[V(\vec{\mathbf{Z}}_{t+1}, \vec{\mathbf{U}}_t, \vec{\mu}_{b_t}) | \vec{u}_t, \vec{\mu}_{b_t}] \\ &= \mathbb{E} \left[ \begin{bmatrix} \vec{u}_t \\ \vec{\mu}_{b_t} \end{bmatrix}^T \mathbf{D}_{t+1(u\mu, z)} \vec{\mathbf{Z}}_{t+1} + \vec{\mathbf{Z}}_{t+1}^T \mathbf{D}_{t+1(z, u\mu)} \begin{bmatrix} \vec{u}_t \\ \vec{\mu}_{b_t} \end{bmatrix} \right] \\ &\quad + \mathbb{E} \left[ \vec{\mathbf{Z}}_{t+1}^T \mathbf{D}_{t+1(z, z)} \vec{\mathbf{Z}}_{t+1} \middle| \begin{bmatrix} \vec{u}_t \\ \vec{\mu}_{b_t} \end{bmatrix} \right] + \begin{bmatrix} \vec{u}_t \\ \vec{\mu}_{b_t} \end{bmatrix}^T \mathbf{D}_{t+1(u\mu, u\mu)} \begin{bmatrix} \vec{u}_t \\ \vec{\mu}_{b_t} \end{bmatrix} + \text{constant} \\ &= \begin{bmatrix} \vec{u}_t \\ \vec{\mu}_{b_t} \end{bmatrix}^T \mathbf{D}_{t+1(u\mu, z)} \mathbf{C}_{BA} + \mathbf{C}_{BA}^T \mathbf{D}_{t+1(z, u\mu)} \\ &\quad + \mathbf{C}_{BA}^T \mathbf{D}_{t+1(u, u)} \mathbf{C}_{BA} + \mathbf{D}_{t+1(u\mu, u\mu)} \begin{bmatrix} \vec{u}_t \\ \vec{\mu}_{b_t} \end{bmatrix} \end{aligned}$$

$Q(\vec{u}_t, \vec{\mu}_{b_t}) = \mathbb{E}[\vec{\mathbf{X}}_{t+1}^T \mathbf{M} \vec{\mathbf{X}}_{t+1} + V(\vec{\mathbf{Z}}_{t+1}, \vec{\mathbf{U}}_t, \vec{\mu}_{b_t}) | \vec{\mathbf{u}}_{1:t}, \vec{\mathbf{z}}_{1:t}]$  which gives  $\mathbf{W}_t$  (26)

The quadratic form of  $V(\vec{z}_t, \vec{u}_{t-1}, \vec{\mu}_{t-1})$  is similar to  $V(\vec{z}_T, \vec{u}_{T-1}, \vec{\mu}_{T-1})$

which gives  $\mathbf{D}_t$  (27)  $\square$

*Proof of Theorem 3.* It's easy to check the initial setting  $\mathbf{W}_T = [\mathbf{B} \ \mathbf{A}]^T \mathbf{M} [\mathbf{B} \ \mathbf{A}]$  matches (5). For general case, we plug  $\mathbf{D}_{t+1}$ (27) into  $\mathbf{W}_t$  (26) and check with  $\mathbf{W}_{t(U,U)}$  first. To simplify proof, let's define

$$\phi_t = \mathbf{W}_{t(\mu,\mu)} - \mathbf{W}_{t(U,\mu)}^T \mathbf{W}_{t(U,U)}^{-1} \mathbf{W}_{t(U,\mu)}.$$

Then from (26),(27)

$$\begin{aligned} \mathbf{W}_t = & [\mathbf{B} \ \mathbf{A}]^T \mathbf{M} [\mathbf{B} \ \mathbf{A}] + [\mathbf{B} - \mathbf{E}_{t+1}\mathbf{CB} \ \mathbf{A} - \mathbf{E}_{t+1}\mathbf{CA}]^T \phi_{t+1} \mathbf{E}_{t+1} [\mathbf{CB} \ \mathbf{CA}] + \\ & [\mathbf{CB} \ \mathbf{CA}]^T \mathbf{E}_{t+1}^T \phi_{t+1} [\mathbf{B} - \mathbf{E}_{t+1}\mathbf{CB} \ \mathbf{A} - \mathbf{E}_{t+1}\mathbf{CA}] + \\ & [\mathbf{CB} \ \mathbf{CA}]^T \mathbf{E}_{t+1}^T \phi_{t+1} \mathbf{E}_{t+1} [\mathbf{CB} \ \mathbf{CA}] + \\ & [\mathbf{B} - \mathbf{E}_{t+1}\mathbf{CB} \ \mathbf{A} - \mathbf{E}_{t+1}\mathbf{CA}]^T \phi_{t+1} [\mathbf{B} - \mathbf{E}_{t+1}\mathbf{CB} \ \mathbf{A} - \mathbf{E}_{t+1}\mathbf{CA}] \end{aligned}$$

$$\begin{aligned} \mathbf{W}_{t(U,U)} = & \mathbf{B}^T \mathbf{M} \mathbf{B} + (\mathbf{B} - \mathbf{E}_{t+1}\mathbf{CB})^T \phi_{t+1} \mathbf{E}_{t+1} \mathbf{CB} + (\mathbf{E}_{t+1}\mathbf{CB})^T \phi_{t+1} (\mathbf{B} - \mathbf{E}_{t+1}\mathbf{CB}) + \\ & (\mathbf{E}_{t+1}\mathbf{CB})^T \phi_{t+1} \mathbf{E}_{t+1} \mathbf{CB} + (\mathbf{B} - \mathbf{E}_{t+1}\mathbf{CB})^T \phi_{t+1} (\mathbf{B} - \mathbf{E}_{t+1}\mathbf{CB}) \\ = & \mathbf{B}^T \mathbf{M} \mathbf{B} + \mathbf{B}^T \phi_{t+1} \mathbf{B} \end{aligned}$$

$$\text{That is } \mathbf{B}^T \mathbf{F}_{t+1} \mathbf{B} = \mathbf{B}^T \mathbf{M} \mathbf{B} + \mathbf{B}^T \phi_{t+1} \mathbf{B}. \quad (47)$$

By plugging out  $\phi_{t+1}$ , the equation(47) matches equation(5).  $\mathbf{W}_{t(U,\mu)}$ ,  $\mathbf{W}_{t(\mu,U)}$ ,  $\mathbf{W}_{t(\mu,\mu)}$  follow similar argument.  $\square$
